# Supplementary material for: Anxiety and depression among medical doctors in Catalonia, Italy, and the UK during the COVID-19 pandemic
Source: PLOS journal article supplement (doi:10.1371/journal.pone.0259213), 2021-11-02
Supplement: S2 (10.1371/journal.pone.0259213.s002) [file journal.pone.0259213.s002]

# Anxiety and Depression among Medical Doctors in Catalonia, Italy, and the UK during the COVID-19 Pandemic

*Readme file*

August 31, 2021

This document guides researchers to replicate the analysis in “*Anxiety and Depression among Medical Doctors in Catalonia, Italy, and the UK during the COVID-19 Pandemic*” by Climent Quintana-Domeque (corresponding author; email: [c.quintana-domeque@exeter.ac.uk](mailto:c.quintana-domeque@exeter.ac.uk)), Ines Lee, Anwen Zhang, Eugenio Proto, Michele Battisti, and Antonia Ho.

## 1. Replication Files

### Running the replication code

The statistical analysis in this paper uses Stata version 16.1. The **Replication\_HCWS.do** file generates the main exhibits of the paper: Table 1 and Figures 1-4.

To run the **Replication\_HCWS.do** file, the user first needs to change the root path to be the path where the replication folder is stored (e.g. “your-path/Replication”). All other directories used in the .do files are defined relative to the root path.

### Installing ADO files

Some of our code use community-provided commands that may not be installed by default in the user’s Stata software.

Examples of ado files that the code uses but may not be installed on the user’s Stata software include:

- The **coefplot** command by Ben Jann (<http://repec.sowi.unibe.ch/stata/coefplot/index.html>)
- The **esttab** command by Ben Jann (<http://repec.sowi.unibe.ch/stata/estout/>)
- The **grc1leg** command

If these commands are not recognized by your Stata software, please download the relevant ado files. This can be done by typing `-findit <command name>-` or `-ssc install <command name>-` into the Stata command line.

If you already have the relevant commands installed but still have problems running the code, you may wish to update the command. You can do this by typing `-ssc install <command name>, replace-`.

## 2. Data and Output Folders

### Data Folder

The **data** folder consists of a .dta file called **HCWS\_data.dta**. This is the dataset used for the analysis. Note that all identifying information (e.g. IP addresses) have been removed so as to protect the identity of the respondents.

### Output Folder

The **output** folder stores the output generated by **Replication\_HCWS.do**. The files created are:

- [Table1 \(.csv\)](#): Table 1 in the manuscript.
- [Fig1 \(.tif and .png\)](#): Figure 1 in the manuscript.
- [Fig2 \(.tif and .png\)](#): Figure 2 in the manuscript.
- [Fig3 \(.tif and .png\)](#): Figure 3 in the manuscript.
- [Fig4 \(.tif and .png\)](#): Figure 4 in the manuscript.
- [TableS7 \(.csv\)](#): Table S7 in the supplement.
